# Supplementary material
Source: PubMed Central journal article supplement (PMC10461181)

## **SUPPLEMENTARY MATERIALS**

## **Supplementary Tables**

**Supplementary Table 1.** Top 22 IC-specific serum metabolites out of more than 390 detected metabolites.

**Supplementary Table 2.** Top 4 differentially expressed analytes in serum.

**Supplementary Table 3.** Top 50 IC-specific urine metabolites out of more than 500 detected metabolites.

**Table S1.**

| Metabolites                      | FC       | FC (log2) | p value   | p value (log 10) |
|----------------------------------|----------|-----------|-----------|------------------|
| ARACHIDONIC ACID                 | 1.5359   | 0.61904   | 0.0092181 | 2.0354           |
| HOMOCYSTEINE                     | 0.56719  | -0.8181   | 0.010477  | 1.9798           |
| BETA-N-ACETYLGLUCOSAMINE         | 0.44663  | -1.1628   | 0.010495  | 1.979            |
| GUANINE                          | 1.8883   | 0.91709   | 0.017327  | 1.7613           |
| PHOSPHATE                        | 0.60255  | -0.73085  | 0.020363  | 1.6912           |
| OXO-OCTADECANOIC ACID            | 1.549    | 0.63129   | 0.021275  | 1.6721           |
| FRUCTOSE                         | 0.51445  | -0.9589   | 0.022772  | 1.6426           |
| GALACTOSE                        | 0.48342  | -1.0486   | 0.025712  | 1.5899           |
| CINNAMOYL-GLUCOSIDE              | 0.086894 | -3.5246   | 0.02723   | 1.5649           |
| 5-AMINO-3-OXOHEXANOIC ACID       | 2.8031   | 1.487     | 0.02922   | 1.5343           |
| ALPHA-KETOISOVALERIC ACID        | 0.52459  | -0.93073  | 0.034539  | 1.4617           |
| N1-ACETYL SPERMIDINE             | 2.4415   | 1.2878    | 0.035978  | 1.444            |
| SUBERIC ACID                     | 1.5113   | 0.59577   | 0.036209  | 1.4412           |
| NONANEDIOIC ACID                 | 1.5733   | 0.65379   | 0.036473  | 1.438            |
| N-ACETYL-GLUTAMINE               | 1.6218   | 0.69759   | 0.052709  | 1.2781           |
| LINOLEIC ACID                    | 1.6795   | 0.74799   | 0.05497   | 1.2599           |
| DIHYDROXYCHOLESTANOYL<br>TAURINE | 1.6197   | 0.6957    | 0.066038  | 1.1802           |
| 4-SULFOPHENOL                    | 2.4622   | 1.2999    | 0.068482  | 1.1644           |
| N-ACETYL-L-ORNITHINE             | 0.65571  | -0.60888  | 0.074893  | 1.1256           |
| OROTIDINE-5-PHOSPHATE            | 1.5619   | 0.64332   | 0.086729  | 1.0618           |
| DIMETHYLSULFONE                  | 2.0339   | 1.0242    | 0.097719  | 1.01             |
| 4-GUANIDINOBUTANOIC ACID         | 1.6081   | 0.68534   | 0.098591  | 1.0062           |

**Table S2.**

| <b>Metabolite</b>         | <b>log<sub>2</sub>FC</b> | <b>Permutation p-value</b> | <b>AUC</b> |
|---------------------------|--------------------------|----------------------------|------------|
| CINNAMOYL.GLUCOSIDE       | 1.467                    | 0.485                      | 0.77       |
| BETA N ACETYLGLUCOSAMINE  | -1.38                    | 0.485                      | 0.765      |
| ARACHIDONIC ACID          | 0.758                    | 0.485                      | 0.773      |
| ALPHA KETOISOVALERIC ACID | 1.955                    | 0.485                      | 0.776      |

Not significant

**Table S3.**

| Metabolites                    | FC      | FC (log2) | p-value    | p-value (log 10) |
|--------------------------------|---------|-----------|------------|------------------|
| PURINE                         | 2.1538  | 1.1069    | 4.29E-05   | 4.3672           |
| PHENYLALANINE                  | 2.1515  | 1.1053    | 0.00050223 | 3.2991           |
| TETRADECADIENYLCARNITINE       | 0.45607 | -1.1327   | 0.00099791 | 3.0009           |
| 5-OXOPROLINE                   | 3.0523  | 1.6099    | 0.0011701  | 2.9318           |
| ACETYLCARNITINE                | 2.0042  | 1.003     | 0.001236   | 2.908            |
| GLYCINE                        | 1.9094  | 0.93309   | 0.002303   | 2.6377           |
| TAURINE                        | 2.144   | 1.1003    | 0.0023347  | 2.6318           |
| INDOXYL SULFATE                | 1.822   | 0.8655    | 0.0029447  | 2.531            |
| CARNITINE                      | 2.0245  | 1.0176    | 0.0031021  | 2.5083           |
| RIBONO-1,4-LACTONE             | 0.56122 | -0.83337  | 0.0032141  | 2.4929           |
| BETA-N-ACETYLGLUCOSAMINE       | 1.8847  | 0.91433   | 0.0038099  | 2.4191           |
| GLUCURONIC ACID                | 0.55165 | -0.85817  | 0.0040161  | 2.3962           |
| ASPARAGINE                     | 5.1368  | 2.3609    | 0.0042038  | 2.3764           |
| VALINE                         | 1.7163  | 0.77934   | 0.0043871  | 2.3578           |
| N-ACETYLASPARAGINE             | 1.8726  | 0.90505   | 0.0059014  | 2.229            |
| DIHYDROXYPHENYLALANINE         | 1.7732  | 0.82632   | 0.0067172  | 2.1728           |
| HIPPURIC ACID                  | 1.5725  | 0.65304   | 0.0067535  | 2.1705           |
| STEARAMIDE                     | 1.6296  | 0.70449   | 0.0073044  | 2.1364           |
| ARABINITOL                     | 1.9886  | 0.99174   | 0.0078588  | 2.1046           |
| GLU-ALA                        | 1.7072  | 0.77162   | 0.0078722  | 2.1039           |
| PYRIDOXAMINE                   | 1.6971  | 0.76304   | 0.0082029  | 2.086            |
| BETAINE                        | 1.6012  | 0.67913   | 0.0082188  | 2.0852           |
| AMP                            | 0.6575  | -0.60494  | 0.0087583  | 2.0576           |
| 2-PYRROLIDINONE                | 1.6041  | 0.68178   | 0.0089036  | 2.0504           |
| 1-DEOXYPENTITOL                | 1.6286  | 0.70362   | 0.0090406  | 2.0438           |
| UREA                           | 1.6604  | 0.73152   | 0.009694   | 2.0135           |
| 5-AMINO-3-OXOHXANOIC ACID      | 1.5473  | 0.62979   | 0.01089    | 1.963            |
| CREATININE                     | 1.7554  | 0.81182   | 0.010933   | 1.9613           |
| 3-HYDROXYHIPURIC ACID          | 0.53126 | -0.9125   | 0.012119   | 1.9165           |
| 3,4-DIHYDROXYPHENYLACETIC ACID | 0.43195 | -1.2111   | 0.012696   | 1.8963           |
| ALLANTOATE                     | 1.5371  | 0.62019   | 0.014199   | 1.8478           |
| PIPECOLIC ACID                 | 1.7739  | 0.8269    | 0.014807   | 1.8295           |
| INDOLE                         | 2.1554  | 1.108     | 0.015201   | 1.8181           |
| 1-METHYLHISTIDINE              | 1.5527  | 0.63474   | 0.016059   | 1.7943           |
| PROPIONYLCARNITINE             | 1.9799  | 0.98545   | 0.025254   | 1.5977           |
| N-ACETYLANALANINE              | 2.2185  | 1.1496    | 0.025826   | 1.5879           |
| PSEUDO URIDINE                 | 0.5779  | -0.7911   | 0.026075   | 1.5838           |
| HYPOXANTHINE                   | 0.60594 | -0.72275  | 0.0293     | 1.5331           |
| PREGNANOLONE SULFATE           | 0.50796 | -0.97721  | 0.031206   | 1.5058           |
| CHOLESTERYL SULFATE            | 2.0258  | 1.0185    | 0.03186    | 1.4968           |
| HISTIDINE                      | 1.5928  | 0.67153   | 0.032355   | 1.4901           |
| 3-PHOSPHOGLYCERATE             | 1.8826  | 0.91271   | 0.032936   | 1.4823           |
| N6-ACETYL-L-LYSINE             | 2.3375  | 1.225     | 0.03459    | 1.461            |
| SULFAMIC ACID                  | 0.46064 | -1.1183   | 0.036634   | 1.4361           |
| ACETYLCHOLINE                  | 2.0768  | 1.0544    | 0.037216   | 1.4293           |
| RIBITOL                        | 0.64391 | -0.63506  | 0.04035    | 1.3942           |
| GLUCURONIC ACID LACTONE        | 0.62234 | -0.68423  | 0.041181   | 1.3853           |
| 3-DEHYDROXYCARNITINE           | 2.1009  | 1.071     | 0.044103   | 1.3555           |
| ALANINE                        | 2.5393  | 1.3444    | 0.049046   | 1.3094           |
| 2-AMINO BUTYRATE               | 1.6461  | 0.71902   | 0.050515   | 1.2966           |

## Supplementary Figures

**Supplementary Figure 1.** Workflow of this study

**Supplementary Figure 2.** Biomarker analysis in serum samples. (A) A heatmap showing unsupervised clustering of the top 25 serum IC-specific metabolites out of more than 500 detected metabolites. (B) Top 15 discriminators by random forest analysis. (C) Enrichment overview of top 50 differentially expressed metabolites in IC compared to NC. Metabolic pathways associated with the metabolite sets are shown.

**Supplementary Figure 3.** Biomarker analysis in urine samples. (A) A heatmap showing unsupervised clustering of top urinary IC-specific metabolites. (B) Top 15 discriminators by random forest analysis. (C) Enrichment overview of top 50 differentially expressed metabolites in IC compared to NC. Metabolic sets that are predicted to be changed in the case of dysfunctional enzymes using genome-scale network model of human metabolism.

FIGURE S1.

## Metabolomics Workflow

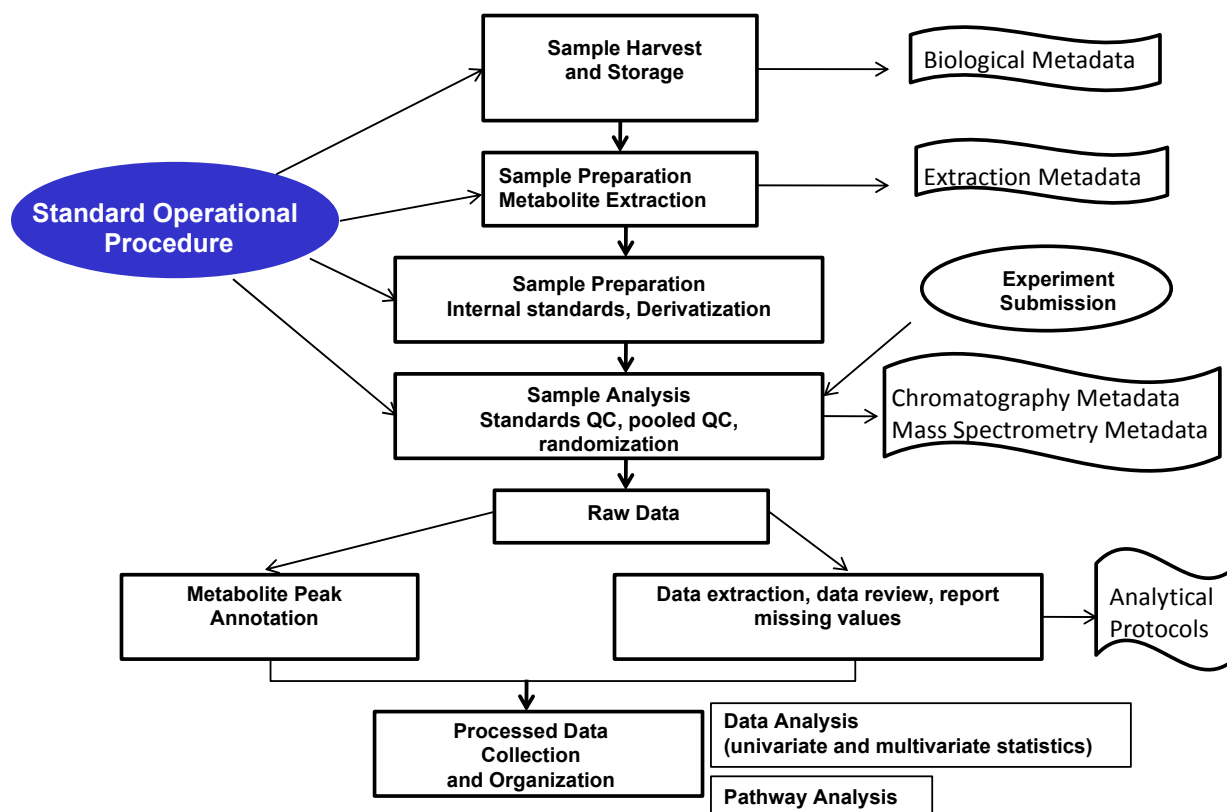

FIGURE S2.

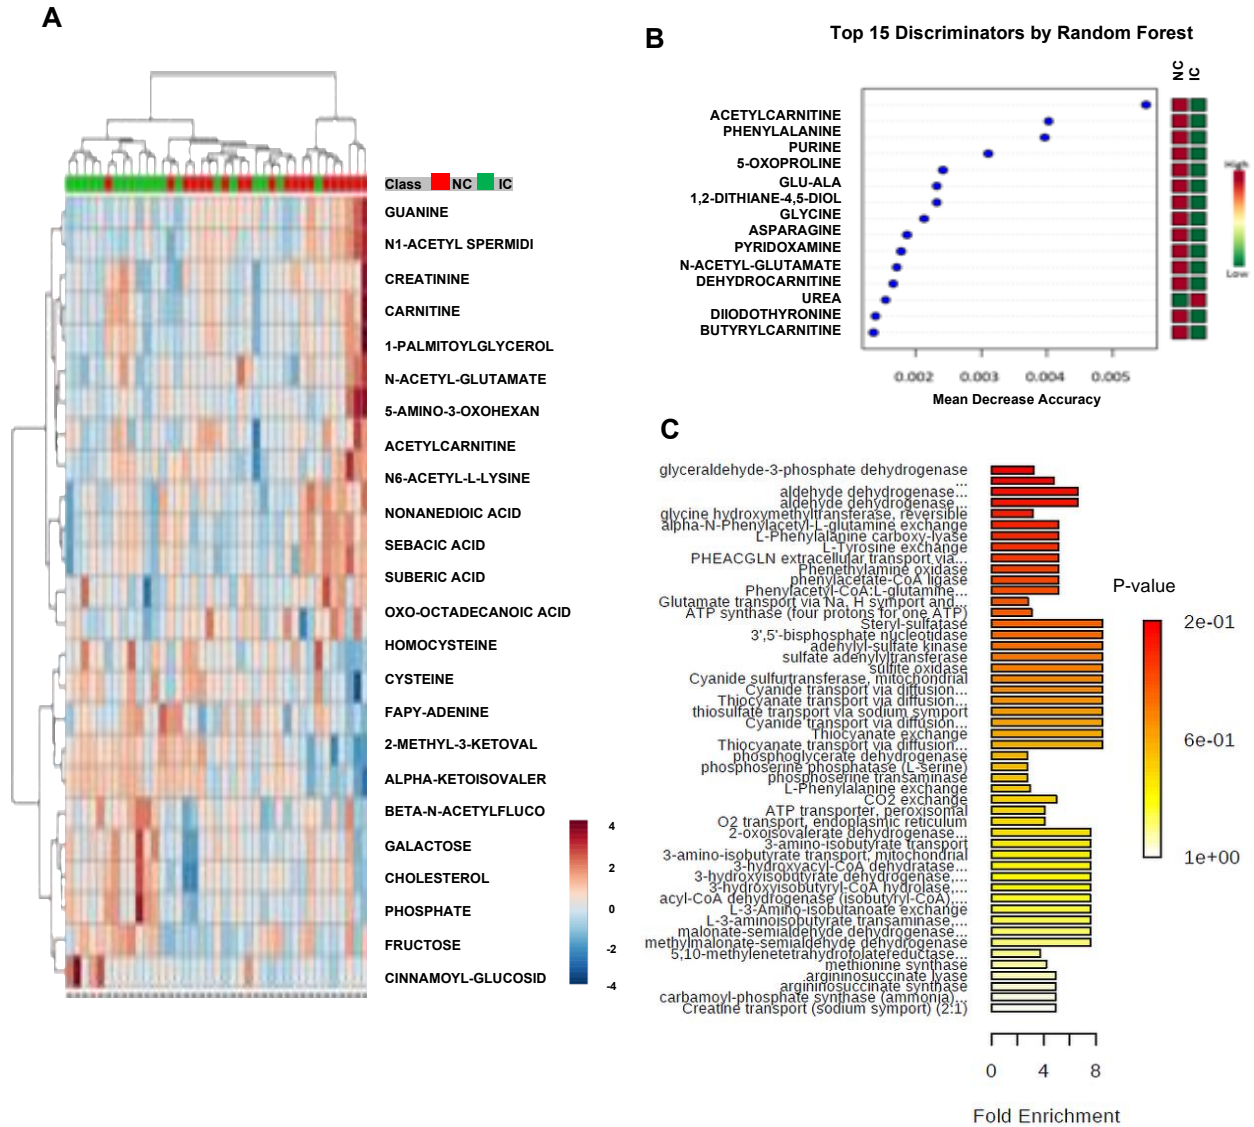



FIGURE S3.

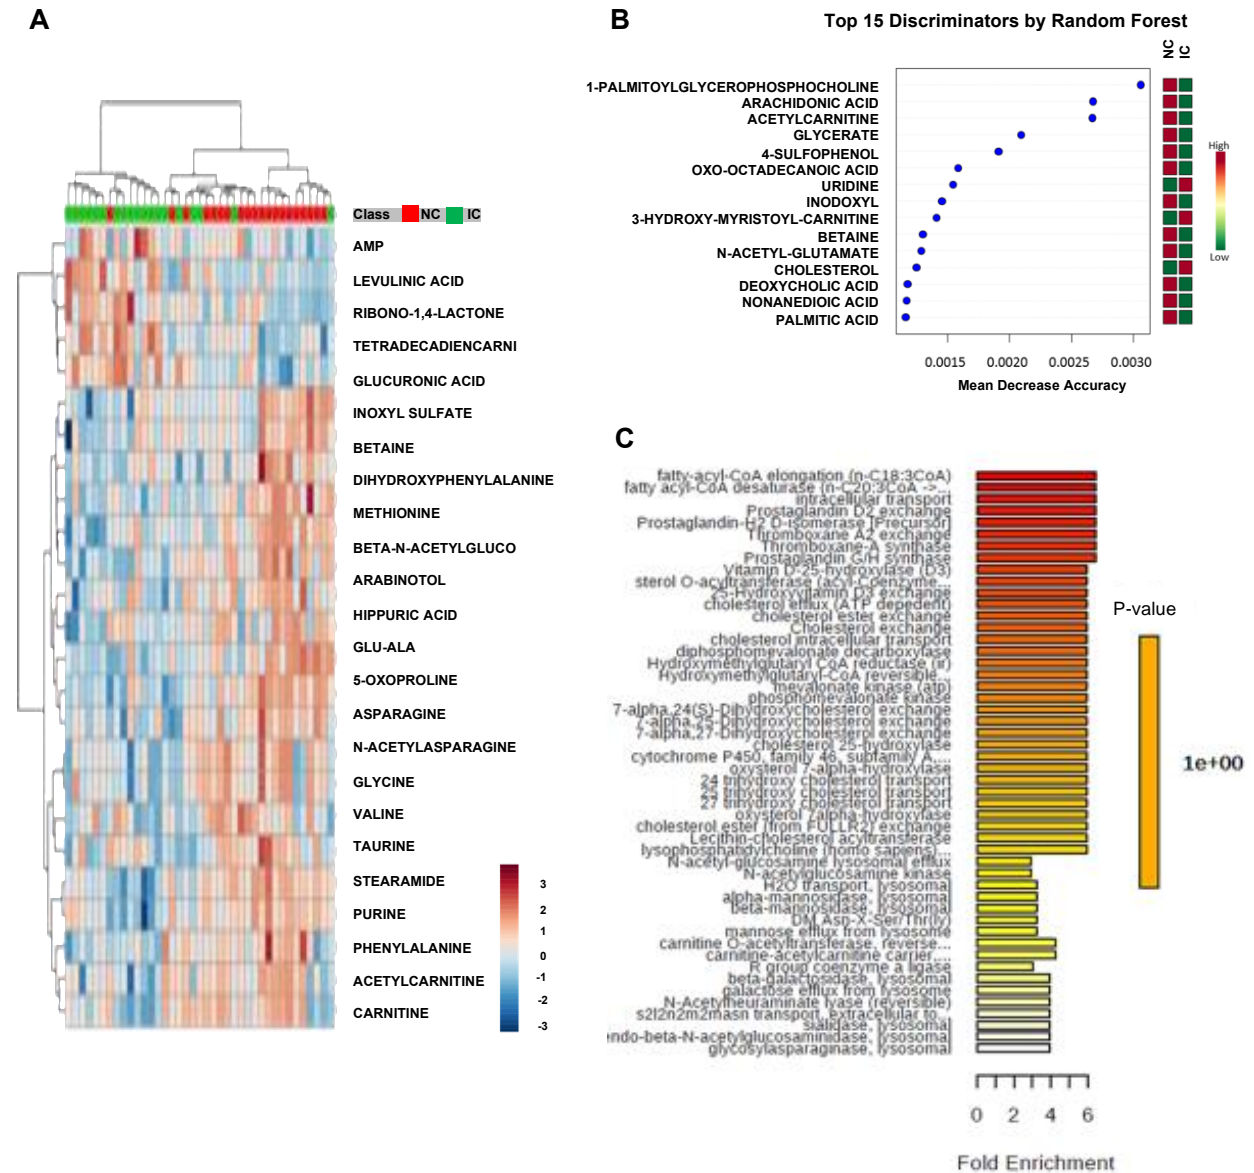

Supplement: NIHMS1926330-supplement-1.pdf [file NIHMS1926330-supplement-1.pdf]
